# Supplementary material
Source: PubMed Central journal article supplement (PMC7116896)
Supplement: EMS115990-supplement-Supplementary_Information.pdf [file EMS115990-supplement-Supplementary_Information.pdf]

1041  
1042  
1043  
1044  
1045  
1046  
1047  
1048  
1049  
1050  
1051  
1052  
1053  
1054  
1055  
1056  
1057  
1058  
1059  
1060  
1061  
1062

1063 **Supplementary references**

1064  
1065  
1066  
1067  
1068  
1069  
1070  
1071  
1072  
1073

34 Khalighinejad, N. *et al.* A Basal Forebrain-Cingulate Circuit in Macaques Decides It Is Time to Act. *Neuron* **105**, 370-384 e378, doi:10.1016/j.neuron.2019.10.030 (2020).

35 Jenkinson, M., Beckmann, C. F., Behrens, T. E., Woolrich, M. W. & Smith, S. M. Fsl. *Neuroimage* **62**, 782-790, doi:10.1016/j.neuroimage.2011.09.015 (2012).

36 Smith, S. M. Fast robust automated brain extraction. *Hum Brain Mapp* **17**, 143-155, doi:10.1002/hbm.10062 (2002).

37 Jenkinson, M., Bannister, P., Brady, M. & Smith, S. Improved optimization for the robust and accurate linear registration and motion correction of brain images. *Neuroimage* **17**, 825-841, doi:S1053811902911328 [pii] (2002).

- 1074 38 Jenkinson, M. & Smith, S. A global optimisation method for robust affine registration  
1075 of brain images. *Medical image analysis* **5**, 143-156 (2001).
- 1076 39 McLaren, D. G. *et al.* A population-average MRI-based atlas collection of the rhesus  
1077 macaque. *Neuroimage* **45**, 52-59, doi:S1053-8119(08)01176-2  
1078 [pii]10.1016/j.neuroimage.2008.10.058 (2009).
- 1079 40 Kolster, H. *et al.* Visual field map clusters in macaque extrastriate visual cortex. *J*  
1080 *Neurosci* **29**, 7031-7039, doi:10.1523/JNEUROSCI.0518-09.2009 (2009).
- 1081 41 Chau, B. K. *et al.* Contrasting Roles for Orbitofrontal Cortex and Amygdala in Credit  
1082 Assignment and Learning in Macaques. *Neuron* **87**, 1106-1118,  
1083 doi:10.1016/j.neuron.2015.08.018 (2015).
- 1084 42 Beckmann, C. F., Jenkinson, M. & Smith, S. M. General multilevel linear modeling  
1085 for group analysis in FMRI. *Neuroimage* **20**, 1052-1063, doi:10.1016/S1053-  
1086 8119(03)00435-XS105381190300435X [pii] (2003).
- 1087 43 Woolrich, M. W., Behrens, T. E., Beckmann, C. F., Jenkinson, M. & Smith, S. M.  
1088 Multilevel linear modelling for FMRI group analysis using Bayesian inference.  
1089 *Neuroimage* **21**, 1732-1747,  
1090 doi:10.1016/j.neuroimage.2003.12.023S1053811903007894 [pii] (2004).
- 1091 44 Woolrich, M. Robust group analysis using outlier inference. *Neuroimage* **41**, 286-301,  
1092 doi:S1053-8119(08)00177-8 [pii]10.1016/j.neuroimage.2008.02.042 (2008).
- 1093 45 Raudenbush, S. W. & Bryk, A. S. *Hierarchical linear models: Applications and data*  
1094 *analysis methods*. Vol. 1 (SAGE, 2002).
- 1095 46 Scholl, J. *et al.* The Good, the Bad, and the Irrelevant: Neural Mechanisms of  
1096 Learning Real and Hypothetical Rewards and Effort. *J Neurosci* **35**, 11233-11251,  
1097 doi:10.1523/JNEUROSCI.0396-15.2015 (2015).
- 1098 47 Scholl, J. *et al.* A role beyond learning for NMDA receptors in reward-based  
1099 decision-making-a pharmacological study using d-cycloserine.  
1100 *Neuropsychopharmacology* **39**, 2900-2909, doi:10.1038/npp.2014.144 (2014).
- 1101 48 Kahneman, D. & Tversky, A. Prospect theory - analysis of decision under risk.  
1102 *Econometrica* **47** (1979).
- 1103 49 Prelec, D. The probability weighting function. *Econometrica*, **66** (1998).
- 1104 50 Sutton, R. & Barto, A. G. *Reinforcement Learning*. (MIT Press, 1998).

- 1105 51 Barron, H. C., Garvert, M. M. & Behrens, T. E. Repetition suppression: a means to  
1106 index neural representations using BOLD? *Philos Trans R Soc Lond B Biol Sci* **371**,  
1107 doi:10.1098/rstb.2015.0355 (2016).
- 1108 52 Zhang, Y., Brady, M. & Smith, S. Segmentation of brain MR images through a  
1109 hidden Markov random field model and the expectation-maximization algorithm.  
1110 *IEEE Trans Med Imaging* **20**, 45-57, doi:10.1109/42.906424 (2001).
- 1111 53 Strait, C. E., Slezzer, B. J. & Hayden, B. Y. Signatures of Value Comparison in  
1112 Ventral Striatum Neurons. *PLoS Biol* **13**, e1002173,  
1113 doi:10.1371/journal.pbio.1002173 (2015).

1114  
1115  
1116  
1117  
1118  
1119  
1120  
1121  
1122  
1123  
1124  
1125  
1126  
1127  
1128  
1129

1130 **Supplementary information** is available for this paper.

1131  
1132  
1133

1360 **Supplementary Information**

1361

| Monkey                       | A   |     |     |     |     | B   |     |     |     |     | C   |     |     |     |     | D   |     |     |     |     |
|------------------------------|-----|-----|-----|-----|-----|-----|-----|-----|-----|-----|-----|-----|-----|-----|-----|-----|-----|-----|-----|-----|
| Session                      | 1   | 2   | 3   | 4   | 5   | 1   | 2   | 3   | 4   | 5   | 3   | 4   | 5   | 6   | 7   | 1   | 2   | 3   | 4   | 5   |
| Planned trials               | 156 | 234 | 234 | 234 | 234 | 156 | 156 | 156 | 156 | 156 | 234 | 234 | 234 | 234 | 234 | 156 | 234 | 234 | 234 | 234 |
| Completed trials             | 156 | 244 | 288 | 246 | 256 | 153 | 155 | 157 | 158 | 155 | 252 | 275 | 230 | 199 | 276 | 156 | 265 | 338 | 438 | 303 |
| Trials in rep.sup. analysis  | /   | /   | 222 | 229 | 220 | /   | /   | 148 | 148 | 148 | /   | /   | 152 | 129 | 158 | /   | /   | 237 | 290 | 252 |
| Trials in grid code analysis | 119 | 185 | 175 | 185 | 178 | 119 | 121 | 122 | 122 | 121 | 136 | 160 | 127 | 108 | 122 | 116 | 150 | 182 | 209 | 203 |

1362

1363

1364 **Supplementary Table 1.** Number of planned and completed trials in each session of  
 1365 experiment 2. Variations are due to the repetition of both pairs for any missed trial. The table  
 1366 also shows the number of trials analysed in the repetition suppression and in the grid code  
 1367 analyses (see Methods).

1368

1369

1370 **Supplementary discussion**

1371 During a decision process, neural activity implements a competition between two or more  
 1372 representations that culminates in one prevailing over the other. The two most widely used  
 1373 classes of models employed to formalise this process are drift-diffusion models and neural  
 1374 attractor models. Both classes of models can readily explain positive as well as negative effects  
 1375 of value difference on BOLD activity depending on whether it is assumed that the neural  
 1376 activity is immediately reset after the decision threshold is reached, or that activity continues  
 1377 until the motor response. Both models predict that the total neural activity will ramp up until  
 1378 the action selection time. This activity increase will be faster when the evidence is stronger,  
 1379 and slower when the evidence is weaker. When the model reaches a threshold (or an attractor  
 1380 state), activity may immediately be reset to baseline, or it can be maintained at a high level  
 1381 until the motor response is triggered, or even until the reward is delivered. The models  
 1382 themselves do not make strong predictions about when this ‘reset’ event is meant to happen,  
 1383 so it is plausible that subtle differences in neural function lead the network to be immediately  
 1384 reset in macaques and to maintain the end state for longer in humans. The figure shows that if  
 1385 activity falls immediately after the threshold is reached (thick lines in the top panel and bright  
 1386 colours in the bottom panel), the BOLD response will be negatively correlated with value  
 1387 difference, as in macaques; but if the activity is maintained for longer (dotted lines in the top  
 1388 panel and shaded colours in the bottom panel), the BOLD response will be positively correlated  
 1389 with value difference, as in humans. Other computational hypotheses may also explain this fact,  
 1390 such as different baseline levels of neural activity.
